# Supplementary material for: Conserved serum protein biomarkers associated with growing early colorectal adenomas
Source: PubMed Central journal article supplement — Proc Natl Acad Sci U S A. 2019 Apr 10;116(17):8471–80. doi: 10.1073/pnas.1813212116 (PMC6486772; doi:10.1073/pnas.1813212116), 2019-04-10

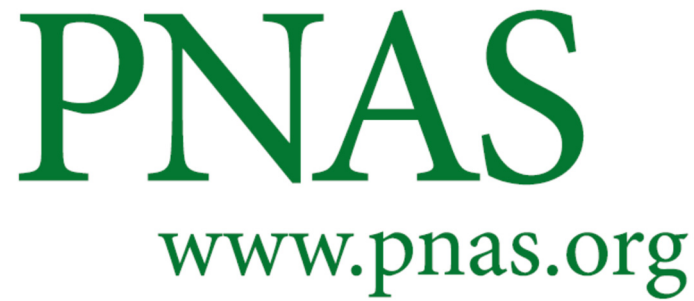

## Supplementary Information for

### **Conserved serum protein biomarkers associated with growing early colorectal adenomas**

Melanie M. Ivancic, Leigh W. Anson, Perry J. Pickhardt, Bryant Megna, Bryan D. Pooler,  
Linda Clipson, Mark Reichelderfer, Michael R. Sussman, William F. Dove

Corresponding author: William F. Dove

Email: [dove@oncology.wisc.edu](mailto:dove@oncology.wisc.edu)

#### **This PDF file includes:**

Supplementary Tables S1 to S5  
Supplementary Figures S1 to S5

**Supplementary Table S1.** An overview of CTC patient data.

| CTC Case # | Sex | Post-polypectomy blood draw* | Path Report Segment    | Path Report Diagnosis                  | Length of Time On Study (Years) | Linear Size at final CTC (mm) | First/Final Volume measurement (mm <sup>3</sup> ) | Percent Growth By Volume | Growth classification based on volume (+/-30% Cutoff) | Overall Patient Growth Classification | Risk classification (based on standard-of-care criteria) |
|------------|-----|------------------------------|------------------------|----------------------------------------|---------------------------------|-------------------------------|---------------------------------------------------|--------------------------|-------------------------------------------------------|---------------------------------------|----------------------------------------------------------|
| 1          | M   |                              | Rectosigmoid           | Tubular adenoma                        | 5.10                            | 9.3                           | 87/88                                             | 1.1                      | Static                                                | Static                                | Low-Risk                                                 |
| 2          | M   |                              | Sigmoid                | Tubular adenoma                        | 5.10                            | 8.2                           | 28/83                                             | 196.4                    | Growing                                               | Growing                               | Low-Risk                                                 |
| 3          | F   |                              | Transverse             | Tubular adenoma, lymphoid follicle     | 5.33                            | 6.7                           | 36/45                                             | 25.0                     | Static                                                | Static                                | Low-Risk                                                 |
| 5          | F   |                              | Ascending              | Hyperplastic polyp                     | 5.33                            | 20.8                          | 38/227                                            | 497.4                    | Growing                                               | Growing                               | High-risk                                                |
|            |     |                              | Rectum                 | Tubular adenoma                        | N/A                             | N/A                           | N/A                                               |                          | Unknown                                               |                                       |                                                          |
| 6          | M   |                              | Rectum                 | Tubular adenoma                        | 5.42                            | 6.2                           | 8/60                                              | 650.0                    | Growing                                               | Growing                               | High-risk                                                |
|            |     |                              | Sigmoid Colon Polyp    | Hyperplastic polyp                     | N/A                             | N/A                           | N/A                                               |                          | Unknown                                               |                                       |                                                          |
| 7          | M   |                              | Cecum                  | Tubulovillous Adenoma                  | 5.61                            | 13.7                          | 33/900                                            | 2627.3                   | Growing                                               | Growing                               | High-risk                                                |
| 8          | F   | No                           | Distal Sigmoid         | Inflammatory Polyp                     | 2.01                            | 11.0                          | 300/393                                           | 31.0                     | Growing                                               | Growing                               | High-risk                                                |
|            |     |                              | Proximal Sigmoid       | Tubular adenoma                        | N/A                             | N/A                           | N/A                                               |                          | Unknown                                               |                                       |                                                          |
|            |     |                              | Mid Sigmoid            | Tubular adenoma                        | N/A                             | N/A                           | N/A                                               |                          | Unknown                                               |                                       |                                                          |
| 9          | F   |                              | Ascending              | Tubular adenoma                        | 5.02                            | 7.7                           | 12/19                                             | 58.3                     | Growing                                               | Growing                               | Low-Risk                                                 |
| 10         | F   |                              | Ascending              | Inflammatory                           | 7.18                            | 8.7                           | --/266                                            |                          | Unknown                                               | Unknown                               | High-risk                                                |
| 11         | M   | No                           | Hepatic flexure        | Tubular adenoma                        | N/A                             | N/A                           | N/A                                               |                          | Unknown                                               | Unknown                               | Low-Risk                                                 |
|            |     |                              | Sigmoid colon          | Tubular adenoma                        | N/A                             | N/A                           | N/A                                               |                          | Unknown                                               |                                       |                                                          |
| 12         | F   |                              | Cecum                  | Tubular adenoma                        | N/A                             | N/A                           | N/A                                               |                          | Unknown                                               | Unknown                               | High-risk                                                |
|            |     |                              | Cecum                  | Tubular adenoma                        | 1.05                            | 5.6                           | 42/26                                             | -38.1                    | Regressing                                            |                                       |                                                          |
| 13         | M   | No                           | Ascending              | Sessile Serrated Adenoma               | 2.02                            | 6.6                           | 169/91                                            | -46.2                    | Regressing                                            | Regressing                            | High-risk                                                |
|            |     |                              | Ascending              | Sessile Serrated Adenoma               | 2.02                            | 6.2                           | 97/58                                             | -40.2                    | Regressing                                            |                                       |                                                          |
| 15         | F   |                              | Transverse             | Tubular adenoma                        | 4.84                            | 4.0                           | 13/7                                              | -46.2                    | Regressing                                            | Growing                               | High-risk                                                |
|            |     |                              | Ascending              | Tubular adenoma                        | 4.84                            | 5.0                           | 60/13                                             | -78.3                    | Regressing                                            |                                       |                                                          |
|            |     |                              | Missing in path report | Tubular adenoma                        | 4.84                            | 7.7                           | 60/91                                             | 51.7                     | Growing                                               |                                       |                                                          |
| 16         | M   |                              | Rectosigmoid           | Tubular adenoma                        | 5.01                            | 6.0                           | 8/53                                              | 562.5                    | Growing                                               | Growing                               | High-risk                                                |
|            |     |                              | Transverse             | Tubular adenoma                        | N/A                             | N/A                           | N/A                                               |                          | Unknown                                               |                                       |                                                          |
| 17         | M   |                              | Descending             | Tubular adenoma                        | N/A                             | N/A                           | N/A                                               |                          | Unknown                                               | Growing                               | Low-Risk                                                 |
|            |     |                              | Sigmoid                | Hyperplastic polyp                     | 5.05                            | 6.4                           | 12/41                                             | 241.7                    | Growing                                               |                                       |                                                          |
|            |     |                              | Ascending              | Tubular adenoma                        | 5.05                            | 5.4                           | --/28                                             |                          | Unknown                                               |                                       |                                                          |
| 18         | M   |                              | Hepatic flexure        | Tubular adenoma                        | 3.18                            | 9.1                           | 174/257                                           | 47.7                     | Growing                                               | Growing                               | Low-Risk                                                 |
|            |     |                              | Rectum                 | Tubular adenoma and hyperplastic polyp | N/A                             | N/A                           | N/A                                               |                          | Unknown                                               |                                       |                                                          |
| 19         | M   |                              | Sigmoid                | Tubular adenoma                        | 7.47                            | 5.6                           | 8/40                                              | 400.0                    | Growing                                               | Growing                               | High-risk                                                |
|            |     |                              | Sigmoid                | Tubular adenoma                        | 7.47                            | 5.5                           | 36/41                                             | 13.9                     | Static                                                |                                       |                                                          |
|            |     |                              | Descending             | Tubular adenoma                        | N/A                             | N/A                           | N/A                                               |                          | Unknown                                               |                                       |                                                          |
| 20         | M   |                              | Sigmoid                | Tubulovillous Adenoma                  | 4.12                            | 9.2                           | 89/100                                            | 12.4                     | Static                                                | Static                                | High-risk                                                |
| 21         | M   |                              | Descending             | Tubulovillous Adenoma                  | 6.00                            | 10.2                          | 178/113                                           | -36.5                    | Regressing                                            | Unknown                               | High-risk                                                |
|            |     |                              | Cecum/Ascending        | Tubular adenoma                        | N/A                             | N/A                           | N/A                                               |                          | Unknown                                               |                                       |                                                          |
| 22         | M   |                              | Cecum                  | Tubular adenoma                        | 3.08                            | 6.0                           | 76/61                                             | -19.7                    | Static                                                | Unknown                               | High-risk                                                |
|            |     |                              | Illeocecal valve       | Tubular adenoma                        | 3.08                            | 6.6                           | 59/65                                             | 10.2                     | Static                                                |                                       |                                                          |
|            |     |                              | Ascending              | Tubular adenoma                        | N/A                             | N/A                           | N/A                                               |                          | Unknown                                               |                                       |                                                          |
| 23         | F   |                              | Sigmoid                | Tubulovillous Adenoma                  | 4.20                            | 7.0                           | 104/161                                           | 54.8                     | Growing                                               | Growing                               | High-risk                                                |
|            |     |                              | Ascending              | Lymphoid Aggregate                     | N/A                             | N/A                           | N/A                                               |                          | Unknown                                               |                                       |                                                          |
|            |     |                              | Rectum                 | Hyperplastic polyp                     | N/A                             | N/A                           | N/A                                               |                          | Unknown                                               |                                       |                                                          |
| 24         | M   |                              | Rectum                 | Tubulovillous Adenoma                  | 3.25                            | 11.4                          | 134/211                                           | 57.5                     | Growing                                               | Growing                               | High-risk                                                |
|            |     |                              | Rectosigmoid           | Tubular adenoma                        | 3.62                            | 10.8                          | 43/219                                            | 409.3                    | Growing                                               |                                       |                                                          |
| 25         | M   |                              | Splenic Flexure        | Tubular adenoma                        | N/A                             | N/A                           | N/A                                               |                          | Unknown                                               | Growing                               | High-risk                                                |
|            |     |                              | Descending             | Hyperplastic polyp                     | N/A                             | N/A                           | N/A                                               |                          | Unknown                                               |                                       |                                                          |
|            |     |                              | Ascending              | Tubular adenoma                        | N/A                             | N/A                           | N/A                                               |                          | Unknown                                               |                                       |                                                          |
|            |     |                              | Transverse             | Tubular adenoma                        | N/A                             | N/A                           | N/A                                               |                          | Unknown                                               |                                       |                                                          |
| 26         | M   |                              | Rectum                 | Hyperplastic polyp                     | 3.11                            | 6.1                           | 28/31                                             | 10.7                     | Static                                                | Unknown                               | Low-Risk                                                 |
|            |     |                              | Sigmoid                | Hyperplastic polyp                     | N/A                             | N/A                           | N/A                                               |                          | Unknown                                               |                                       |                                                          |

| CTC Case # | Sex | Post-polypectomy blood draw* | Path Report Segment | Path Report Diagnosis                  | Length of Time On Study (Years) | Linear Size at final CTC (mm) | First/Final Volume measurement (mm <sup>3</sup> ) | Percent Growth By Volume | Growth classification based on volume (+/- 30% Cutoff) | Overall Patient Growth Classification | Risk classification (based on standard-of-care criteria) |
|------------|-----|------------------------------|---------------------|----------------------------------------|---------------------------------|-------------------------------|---------------------------------------------------|--------------------------|--------------------------------------------------------|---------------------------------------|----------------------------------------------------------|
| 28         | F   |                              | Sigmoid             | Tubular adenoma and hyperplastic polyp | 3.40                            | 6.1                           | 16/25                                             | 56.3                     | Growing                                                | Growing                               | High-risk                                                |
|            |     |                              | Rectum              | Tubular adenoma                        | 3.40                            | 9.0                           | 56/94                                             | 67.9                     | Growing                                                |                                       |                                                          |
|            |     |                              | Ascending           | Tubular adenoma                        | N/A                             | N/A                           | N/A                                               |                          | Unknown                                                |                                       |                                                          |
|            |     |                              | Transverse          | Hyperplastic polyp                     | N/A                             | N/A                           | N/A                                               |                          | Unknown                                                |                                       |                                                          |
| 29         | F   |                              | Descending          | Hyperplastic polyp                     | N/A                             | N/A                           | N/A                                               |                          | Unknown                                                | Unknown                               | High-risk                                                |
|            |     |                              | Cecum               | Sessile Serrated Adenoma               | 5.02                            | 7.8                           | 40/35                                             | -12.5                    | Static                                                 |                                       |                                                          |
| 30         | F   | No                           | Transverse          | Sessile Serrated Adenoma               | N/A                             | N/A                           | N/A                                               |                          | Unknown                                                | Growing                               | High-risk                                                |
|            |     |                              | Cecum               | Tubulovillous Adenoma                  | 5.05                            | 14.3                          | 54/238                                            | 340.7                    | Growing                                                |                                       |                                                          |
| 32         | M   |                              | Cecum               | Tubular adenoma                        | 5.05                            | 9.9                           | 76/86                                             | 13.2                     | Static                                                 | Growing                               | Low-Risk                                                 |
|            |     |                              | Ascending           | Tubular adenoma                        | N/A                             | N/A                           | N/A                                               |                          | Unknown                                                |                                       |                                                          |
| 33         | F   |                              | Descending          | Tubular adenoma                        | 5.27                            | 10.4                          | 161/321                                           | 99.4                     | Growing                                                | Growing                               | High-risk                                                |
|            |     |                              | Ascending           | Sessile Serrated Adenoma               | 7.98                            | 6.2                           | 11/17                                             | 54.5                     | Growing                                                |                                       |                                                          |
| 34         | M   | No                           | Transverse          | Tubular adenoma                        | 7.98                            | 7.0                           | --/21                                             |                          | Unknown                                                | Growing                               | High-risk                                                |
|            |     |                              | Transverse          | Tubular adenoma                        | 10.69                           | 9.3                           | 30/70                                             | 133.3                    | Growing                                                |                                       |                                                          |
| 35         | M   | No                           | Ascending           | Tubular adenoma                        | N/A                             | N/A                           | N/A                                               |                          | Unknown                                                | Unknown                               | High-risk                                                |
|            |     |                              | Ascending           | Tubular adenoma                        | 3.51                            | 8.0                           | 45/46                                             | 2.2                      | Static                                                 |                                       |                                                          |
| 35         | M   | No                           | Splenic flexure     | Tubular adenoma                        | N/A                             | N/A                           | N/A                                               |                          | Unknown                                                | Unknown                               | High-risk                                                |

\*Post-polypectomy blood draw was obtained unless otherwise indicated.

**Supplementary Table S2.** Target protein biomarker sequences, reference standards, and monitored charge states and ions for LC/MS analysis.

| Protein Name                                 | Protein Symbol | Endogenous Peptide Sequence | Peptide Reference Standard Sequence*        | Dominant Charge State | Peptide Ions Monitored (Qtrap 5500) | Peptide Ion Quantified |
|----------------------------------------------|----------------|-----------------------------|---------------------------------------------|-----------------------|-------------------------------------|------------------------|
| CD44 antigen                                 | CD44           | YGFIEGHVVIPR                | YGFIEGHV <b>V</b> I*P*R                     | 3                     | y4, y5, y6                          | y4                     |
| Complement Factor I                          | CFI            | VFSLQWGEVK                  | VFSLQWGE <b>V</b> *K                        | 2                     | y5, y6, y7, y8                      | y5                     |
| Leucine-Rich alpha-2-glycoprotein            | Lrg1           | VAAGAFQGLR                  | VAAGAFQGL* <b>R</b><br>(13C labeled only)   | 2                     | y5, y7, y8, y9                      | y8                     |
| Epidermal Growth Factor Receptor             | EGFR           | IPLLENLQIIR                 | IPLLENLQI <b>I</b> *R<br>(13C labeled only) | 2                     | y5, y6, y7, y8                      | y7                     |
| Inter-alpha-trypsin inhibitor heavy chain H3 | Itih3          | EVSFDVELPK                  | EVSFDVEL* <b>P</b> K<br>(13C labeled only)  | 2                     | y5, y6, y7, y8                      | y5                     |
| Coagulation factor V                         | F5             | NFFNPPIISR                  | NFFNPPII* <b>S</b> R<br>(13C labeled only)  | 2                     | y6, y7, y8, b8                      | y6                     |
| Hemopexin                                    | Hpx            | LWWLDLK                     | LWWLDL* <b>K</b><br>(13C labeled only)      | 2                     | y4, y5, y6, b5                      | y5                     |
| Vitamin D-binding protein                    | Gc             | VLEPTLK                     | VLEPTL* <b>K</b><br>(13C labeled only)      | 2                     | y4, y5, y6                          | y4                     |
| Vitronectin                                  | VTN            | FEDGVLDPDYPR                | FEDGVLDPDY <b>P</b> *R                      | 2                     | y5, y6, y7, y8                      | y5                     |
| Inter-alpha-trypsin inhibitor, Heavy chain 4 | ITIH4          | FAHTVVTSR                   | FAHTV <b>V</b> T*SR                         | 3                     | y3, y4, b3, b4                      | y3                     |
| Serum Amyloid P                              | APCS           | GYVLIKPLVWV                 | GYVLIK <b>P</b> L*VWV<br>(13C labeled only) | 2                     | y6, y7, y8, b9                      | b9                     |
| Fetuin B                                     | FetuB          | IFFESVYGQCK                 | IFFESVYGQ <b>C</b> *K                       | 2                     | y6, y7, y8, y9                      | y9                     |
| C-reactive protein                           | Crp            | ESDTSYVSLK                  | ESDTSYVSL* <b>K</b><br>(13C labeled only)   | 2                     | y5, y6, y8                          | y6                     |
| Sulfhydryl Oxidase 1                         | QSOX1          | LAGAPSEDPQFPK               | LAGAPSEDPQF <b>P</b> *K                     | 2                     | y5, y7, y9, b4                      | y9                     |
| Peptidase inhibitor 16                       | PI16           | WDEELAAFAK                  | WDEELAA <b>F</b> *K                         | 2                     | y6, y8, y9                          | y8                     |
| Cadherin-2 (N-Cadherin)                      | Cdh2           | GPFQELVR                    | GPFQEL* <b>V</b> R<br>(13C Labeled Only)    | 2                     | y6, y7, b3                          | y6                     |
| Dipeptidyl peptidase 4                       | DPP4           | WEYYDSVYTER                 | WEYYDSV <b>Y</b> *TER                       | 2                     | y7, y8, y9, b5                      | y9                     |
| extracellular superoxide dismutase [Cu-Zn]   | Sod3           | VTGVVLFRR                   | VTGVV <b>L</b> *FR<br>(13C Labeled Only)    | 2                     | y4, y5, y6, y7                      | y6                     |
| Thrombospondin-4                             | Thbs4          | DVDIDSYPDEELPCSAR           | DVDIDSYPDEEL <b>P</b> CSA*R                 | 2                     | y5, y9, y10, b7                     | y10                    |

Bolded\* indicates the amino acid labeled with <sup>13</sup>C<sup>15</sup>N unless otherwise indicated

**Supplementary Table S3.** An overview of patient data from optical colonoscopy.

| <b>Sample Number</b> | <b>Sex</b> | <b>Number of Polyps Identified</b> | <b>Pathology Diagnosis</b>                             | <b>Adenoma Risk classification (based on pathology)</b> |
|----------------------|------------|------------------------------------|--------------------------------------------------------|---------------------------------------------------------|
| 31227                | F          | 1                                  | Large Sessile Serrated Adenoma                         | High-Risk                                               |
| 31273                | F          | 4                                  | Hyperplastic polyp and family history                  | High-Risk                                               |
| 23051                | F          | 7                                  | Hyperplastic polyps                                    | High-Risk                                               |
| 31633                | F          | 1                                  | Large sessile serrated adenoma                         | High-Risk                                               |
| 30653                | F          | 4                                  | Multiple sessile serrated adenomas                     | High-Risk                                               |
| 31527                | F          | 9                                  | Multiple tubular adenomas and hyperplastic polyps      | High-Risk                                               |
| 21344                | F          | 3                                  | non-neoplastic colonic mucosa, multiple biopsies       | High-Risk                                               |
| 22910                | F          | 1                                  | Tubular adenoma                                        | High-Risk                                               |
| 31489                | F          | 2                                  | Large tubular adenoma and sessile serrated adenoma     | High-Risk                                               |
| 22911                | F          | 2                                  | Tubular adenoma and benign colonic mucosa              | High-Risk                                               |
| 31532                | F          | 2                                  | Tubular adenoma and large hyperplastic polyp           | High-Risk                                               |
| 23252                | F          | 2                                  | Tubular adenomas                                       | High-Risk                                               |
| 21489                | F          | 1                                  | Tubulovillous adenoma                                  | High-Risk                                               |
| 31472                | M          | 1                                  | Hyperplastic polyp and family history                  | High-Risk                                               |
| 31530                | M          | 4                                  | Multiple sessile serrated adenomas                     | High-Risk                                               |
| 30771                | M          | 6                                  | Multiple tubular adenomas                              | High-Risk                                               |
| 23061                | M          | 3                                  | Normal mucosa/lymphoid aggregates, tubular adenoma     | High-Risk                                               |
| 22797                | M          | 7                                  | Sessile serrated polyp/adenoma and hyperplastic polyps | High-Risk                                               |
| 30651                | M          | 2                                  | Large tubular adenoma and hyperplastic polyp           | High-Risk                                               |
| 31611                | M          | 1                                  | Tubular adenoma and family history                     | High-Risk                                               |
| 21528                | M          | 2                                  | Tubular adenoma and sessile serrated polyp             | High-Risk                                               |
| 21756                | M          | 2                                  | Tubular adenoma, and tubulovillous adenoma             | High-Risk                                               |
| 22887                | M          | 9                                  | Tubular adenomas and hyperplastic polyps               | High-Risk                                               |
| 22798                | M          | 5                                  | Tubular adenomas and a large tubulovillous adenoma     | High-Risk                                               |
| 22928                | F          | 2                                  | Benign colonic mucosa, multiple biopsies               | Low-Risk                                                |
| 31634                | F          | 0                                  | Gastric biopsies, colonoscopy normal                   | Low-Risk                                                |
| 21216                | F          | 1                                  | Hyperplastic polyp                                     | Low-Risk                                                |
| 30497                | F          | 1                                  | Hyperplastic polyp                                     | Low-Risk                                                |
| 22927                | F          | 1                                  | Hyperplastic polyp and benign colonic mucosa           | Low-Risk                                                |
| 31488                | F          | 2                                  | Hyperplastic polyps                                    | Low-Risk                                                |
| 31471                | F          | 2                                  | Sessile serrated adenoma/polyp                         | Low-Risk                                                |
| 21214                | F          | 1                                  | Tubular adenoma                                        | Low-Risk                                                |
| 21527                | F          | 1                                  | Tubular adenoma                                        | Low-Risk                                                |
| 21837                | F          | 1                                  | Tubular adenoma                                        | Low-Risk                                                |
| 22872                | F          | 1                                  | Tubular adenoma                                        | Low-Risk                                                |
| 30629                | F          | 1                                  | Tubular Adenoma                                        | Low-Risk                                                |
| 31612                | F          | 1                                  | Tubular adenoma                                        | Low-Risk                                                |
| 31947                | F          | 1                                  | Tubular Adenoma                                        | Low-Risk                                                |
| 22891                | F          | 3                                  | Tubular adenoma and hyperplastic polyp                 | Low-Risk                                                |
| 22892                | F          | 3                                  | Tubular adenoma and hyperplastic polyp                 | Low-Risk                                                |
| 23060                | F          | 2                                  | Tubular adenoma and normal mucosa                      | Low-Risk                                                |
| 21478                | M          | 1                                  | Hyperplastic polyp                                     | Low-Risk                                                |
| 21968                | M          | 2                                  | Hyperplastic polyps                                    | Low-Risk                                                |

| Sample Number | Sex | Number of Polyps Identified | Pathology Diagnosis                       | Adenoma Risk classification (based on pathology) |
|---------------|-----|-----------------------------|-------------------------------------------|--------------------------------------------------|
| 22848         | M   | 0                           | Ischemic colitis                          | Low-Risk                                         |
| 23250         | M   | 1                           | Lymphoid nodule, sessile serrated adenoma | Low-Risk                                         |
| 23251         | M   | 1                           | Mucosal lymphoid nodule/normal mucosa     | Low-Risk                                         |
| 23254         | M   | 1                           | Mucosal lymphoid nodule/normal mucosa     | Low-Risk                                         |
| 21474         | M   | 3                           | Nondysplastic mucosa and tubular adenoma  | Low-Risk                                         |
| 23248         | M   | 1                           | Normal mucosa                             | Low-Risk                                         |
| 22800         | M   | 1                           | Sessile serrated adenoma/polyp            | Low-Risk                                         |
| 21154         | M   | 1                           | Tubular adenoma                           | Low-Risk                                         |
| 21529         | M   | 1                           | Tubular adenoma                           | Low-Risk                                         |
| 21836         | M   | 2                           | Tubular adenoma                           | Low-Risk                                         |
| 22869         | M   | 1                           | Tubular adenoma                           | Low-Risk                                         |
| 22929         | M   | 1                           | Tubular Adenoma                           | Low-Risk                                         |
| 22989         | M   | 1                           | Tubular Adenoma                           | Low-Risk                                         |
| 23042         | M   | 1                           | Tubular Adenoma                           | Low-Risk                                         |
| 21488         | M   | 2                           | Tubular adenoma, and hyperplastic polyp   | Low-Risk                                         |
| 23039         | M   | 1                           | Tubular Adenoma, Colectomy                | Low-Risk                                         |
| 23247         | M   | 2                           | Tubular adenoma/Hyperplastic polyp        | Low-Risk                                         |
| 31167         | M   | 2                           | Tubular Adenomas                          | Low-Risk                                         |
| 30628         | M   | 2                           | Tubular Adenomas                          | Low-Risk                                         |
| 22997         | M   | 3                           | Tubular adenomas/Normal mucosal polyp     | Low-Risk                                         |
| 21685         | F   | N/A                         | Screening Normal                          | N/A                                              |
| 21755         | F   | N/A                         | Screening Normal                          | N/A                                              |
| 21530         | F   | N/A                         | Screening Normal                          | N/A                                              |
| 22888         | F   | N/A                         | Screening Normal                          | N/A                                              |
| 22909         | F   | N/A                         | Screening Normal                          | N/A                                              |
| 21958         | F   | N/A                         | Screening Normal                          | N/A                                              |
| 22987         | F   | N/A                         | Screening Normal                          | N/A                                              |
| 22988         | F   | N/A                         | Screening Normal                          | N/A                                              |
| 23031         | F   | N/A                         | Screening Normal                          | N/A                                              |
| 30431         | F   | N/A                         | Screening Normal                          | N/A                                              |
| 30967         | F   | N/A                         | Screening Normal                          | N/A                                              |
| 31090         | F   | N/A                         | Screening Normal                          | N/A                                              |
| 31248         | F   | N/A                         | Screening Normal                          | N/A                                              |
| 21155         | M   | N/A                         | Screening Normal                          | N/A                                              |
| 21684         | M   | N/A                         | Screening Normal                          | N/A                                              |
| 22847         | M   | N/A                         | Screening Normal                          | N/A                                              |
| 22849         | M   | N/A                         | Screening Normal                          | N/A                                              |
| 22996         | M   | N/A                         | Screening Normal                          | N/A                                              |
| 23059         | M   | N/A                         | Screening Normal                          | N/A                                              |
| 23032         | M   | N/A                         | Screening Normal                          | N/A                                              |
| 30517         | M   | N/A                         | Screening Normal                          | N/A                                              |
| 23076         | M   | N/A                         | Screening Normal                          | N/A                                              |
| 23253         | M   | N/A                         | Screening Normal                          | N/A                                              |
| 31571         | M   | N/A                         | Screening Normal                          | N/A                                              |
| 30432         | M   | N/A                         | Screening Normal                          | N/A                                              |

| <b>Sample Number</b> | <b>Sex</b> | <b>Number of Polyps Identified</b> | <b>Pathology Diagnosis</b> | <b>Adenoma Risk classification (based on pathology)</b> |
|----------------------|------------|------------------------------------|----------------------------|---------------------------------------------------------|
| 31130                | M          | N/A                                | Screening Normal           | N/A                                                     |
| 31528                | M          | N/A                                | Screening Normal           | N/A                                                     |

**Supplementary Tables S4a-c.** Quantitation by targeted mass spectrometry of the levels of the 19 candidate serum proteins in patients from the CTC and OC cohorts.

**Supplementary Table S4a.** Panel 4a presents the median ratios of the test samples to the labeled peptide standard for each protein of interest.

### Median Ratio-to-Reference Standard

| Protein   | Screening Normal Relative Ratio-to-Standard | Unknown Growth Relative Ratio-to-Standard | Growing Relative Ratio-to-Standard | Growing High-Risk Relative Ratio-to-Standard |
|-----------|---------------------------------------------|-------------------------------------------|------------------------------------|----------------------------------------------|
| QSOX1     | 0.211                                       | 0.218                                     | 0.222                              | 0.213                                        |
| F5        | 0.859                                       | 0.859                                     | 1.184                              | 1.183                                        |
| ITIH4     | 1.781                                       | 1.664                                     | 2.012                              | 1.971                                        |
| CRP       | 0.317                                       | 0.473                                     | 0.885                              | 0.894                                        |
| LRG1      | 2.992                                       | 3.006                                     | 3.375                              | 3.473                                        |
| DPP4      | 0.080                                       | 0.080                                     | 0.074                              | 0.076                                        |
| EGFR      | 0.052                                       | 0.052                                     | 0.054                              | 0.053                                        |
| SOD3      | 0.146                                       | 0.154                                     | 0.169                              | 0.167                                        |
| CDH2      | 0.022                                       | 0.023                                     | 0.024                              | 0.021                                        |
| HPX       | 7.862                                       | 6.653                                     | 8.028                              | 6.399                                        |
| ITIH3     | 1.564                                       | 1.529                                     | 1.722                              | 1.779                                        |
| APCS      | 6.863                                       | 6.674                                     | 6.713                              | 6.855                                        |
| FETUB     | 4.618                                       | 4.680                                     | 4.750                              | 4.661                                        |
| GC (VitD) | 1.401                                       | 1.376                                     | 1.435                              | 1.401                                        |
| CD44      | 0.713                                       | 0.694                                     | 0.722                              | 0.708                                        |
| CFI       | 4.360                                       | 4.217                                     | 4.672                              | 5.271                                        |
| PI16      | 0.473                                       | 0.476                                     | 0.469                              | 0.434                                        |
| THBS4     | 0.106                                       | 0.121                                     | 0.124                              | 0.124                                        |
| VTN       | 4.182                                       | 4.005                                     | 4.676                              | 4.648                                        |



**Supplementary Table S4b.** Panel 4b presents the ratios that compare these medians between the sets of patients whose adenomas have been classified as Growing, Unknown Growth (likely non-growing), or (adenoma-free) Screening Normal. Significant differences at  $p < 0.05$  are shown in red.

### Comparison group ratio of ratios

| Protein   | Unknown Growth vs. Screening Normal | Growing vs. Screening Normal | Growing vs. Unknown Growth | Growing High-Risk vs. Screening Normal |
|-----------|-------------------------------------|------------------------------|----------------------------|----------------------------------------|
| QSOX1     | 1.035                               | <b>1.054</b>                 | 1.018                      | 1.013                                  |
| F5        | 0.999                               | <b>1.378</b>                 | <b>1.379</b>               | <b>1.377</b>                           |
| ITIH4     | 0.934                               | 1.130                        | <b>1.209</b>               | 1.107                                  |
| CRP       | 1.493                               | <b>2.791</b>                 | <b>1.869</b>               | <b>2.822</b>                           |
| LRG1      | 1.005                               | <b>1.128</b>                 | <b>1.123</b>               | 1.161                                  |
| DPP4      | 1.004                               | 0.925                        | 0.922                      | 0.956                                  |
| EGFR      | 1.003                               | 1.038                        | 1.035                      | 1.012                                  |
| SOD3      | 1.055                               | 1.160                        | 1.100                      | 1.145                                  |
| CDH2      | 1.047                               | 1.059                        | 1.012                      | 0.940                                  |
| HPX       | 0.846                               | 1.021                        | 1.207                      | 0.814                                  |
| ITIH3     | 0.978                               | 1.101                        | 1.126                      | 1.137                                  |
| APCS      | 0.972                               | 0.978                        | 1.006                      | 0.999                                  |
| FETUB     | 1.013                               | 1.029                        | 1.015                      | 1.009                                  |
| GC (VitD) | 0.982                               | 1.024                        | 1.043                      | 1.000                                  |
| CD44      | 0.973                               | 1.012                        | 1.041                      | 0.992                                  |
| CFI       | 0.967                               | 1.072                        | 1.108                      | 1.209                                  |
| PI16      | 1.006                               | 0.991                        | 0.985                      | 0.917                                  |
| THBS4     | 1.147                               | 1.171                        | 1.021                      | 1.175                                  |
| VTN       | 0.957                               | <b>1.118</b>                 | 1.168                      | 1.111                                  |

**Supplementary Table S4c.** Panel 4c presents the non-parametric p-values for tests of difference between two specified groups of patients. Significant differences at  $p < 0.05$  are shown in red.

**Mann-Whitney p-values for comparison groups**

| Protein   | Unknown Growth vs. Screening Normal | Growing vs. Screening Normal | Growing vs. Unknown Growth | Growing High-Risk vs. Screening Normal |
|-----------|-------------------------------------|------------------------------|----------------------------|----------------------------------------|
| QSOX1     | 0.2543                              | <b>0.0312</b>                | 0.2554                     | 0.1757                                 |
| F5        | 0.9203                              | <b>0.0005</b>                | <b>0.0001</b>              | <b>0.0029</b>                          |
| ITIH4     | 0.1141                              | 0.1548                       | <b>0.0043</b>              | 0.2938                                 |
| CRP       | 0.1936                              | <b>0.0045</b>                | <b>0.0271</b>              | <b>0.0017</b>                          |
| LRG1      | 0.6527                              | <b>0.0304</b>                | <b>0.0331</b>              | 0.0671                                 |
| DPP4      | 0.5419                              | 0.1984                       | 0.4607                     | 0.4088                                 |
| EGFR      | 0.9761                              | 0.9176                       | 0.7962                     | 0.8985                                 |
| SOD3      | 0.5029                              | 0.1978                       | 0.3944                     | 0.1847                                 |
| CDH2      | 0.9840                              | 0.4520                       | 0.5840                     | 0.9459                                 |
| HPX       | 0.0703                              | 0.3081                       | 0.8360                     | 0.1024                                 |
| ITIH3     | 0.6892                              | 0.6269                       | 0.2042                     | 0.9459                                 |
| APCS      | 0.4533                              | 0.8772                       | 0.9053                     | 0.9028                                 |
| FETUB     | 0.5419                              | 0.3297                       | 0.8930                     | 0.5408                                 |
| GC (VitD) | 0.4777                              | 0.5071                       | 0.3944                     | 0.8175                                 |
| CD44      | 0.4777                              | 0.7740                       | 0.4110                     | 0.9028                                 |
| CFI       | 0.4354                              | 0.5770                       | 0.2324                     | 0.3183                                 |
| PI16      | 0.3628                              | 0.3081                       | 0.3550                     | 0.3334                                 |
| THBS4     | 0.4777                              | 0.3757                       | 0.8829                     | 0.3431                                 |
| VTN       | 1.0000                              | <b>0.0415</b>                | 0.0859                     | 0.1084                                 |

Supplementary Table S5

Logistic regression Analysis (Single variable) for Volumetric Growth vs. Unknown Growth

| Protein | Chi Sq. Value | Chi P-value | CV      | Std. Error | p-value | Odds Ratio | CI Low   | CI high | AUC   |
|---------|---------------|-------------|---------|------------|---------|------------|----------|---------|-------|
| F5      | 15.397        | 0.000       | 3.963   | 1.122      | 0.0004  | 52.608     | 5.837    | 474.157 | 0.784 |
| ITIH4   | 76.000        | 0.002       | 2.099   | 0.746      | 0.0049  | 8.161      | 1.891    | 35.221  | 0.722 |
| LRG1    | 4.949         | 0.026       | 0.630   | 0.290      | 0.0299  | 1.877      | 1.063    | 3.315   | 0.686 |
| CRP     | 0.660         | 0.416       | 0.194   | 0.232      | 0.4032  | 1.214      | 0.770    | 1.915   | 0.646 |
| VTN     | 2.472         | 0.116       | 0.321   | 0.210      | 0.1268  | 1.379      | 0.913    | 2.082   | 0.632 |
| QSOX1   | 1.005         | 0.316       | 4.641   | 4.599      | 0.3128  | 103.680    | 0.013    | 3.674   | 0.599 |
| CFI     | 2.069         | 0.150       | 0.296   | 0.207      | 0.1514  | 1.345      | 0.897    | 2.016   | 0.594 |
| ITIH3   | 1.159         | 0.282       | 0.376   | 0.347      | 0.2786  | 1.457      | 0.738    | 2.876   | 0.589 |
| PI16    | 0.870         | 0.351       | -1.157  | 1.392      | 0.4058  | 0.314      | 0.021    | 4.814   | 0.567 |
| VITD    | 0.888         | 0.346       | 1.148   | 1.229      | 0.3502  | 3.151      | 0.284    | 35.008  | 0.562 |
| CD44    | 1.206         | 0.272       | 1.449   | 1.320      | 0.272   | 4.261      | 0.321    | 56.587  | 0.559 |
| APCS    | 1.966         | 0.161       | 0.097   | 0.069      | 0.1577  | 1.102      | 0.963    | 1.261   | 0.552 |
| THBS4   | 0.183         | 0.669       | 2.813   | 6.521      | 0.6662  | 16.653     | 1.97E-05 | 0.598   | 0.537 |
| DPP4    | 0.339         | 0.561       | -3.562  | 6.917      | 0.6066  | 0.028      | 2.19E-05 | 8.958   | 0.533 |
| EGFR    | 0.625         | 0.429       | -14.663 | 23.708     | 0.5363  | <0.00001   | 6.17E-05 | 1.734   | 0.529 |
| CDH2    | 0.408         | 0.523       | 20.507  | 31.972     | 0.5213  | 3.74E+04   | <0.00001 | 1.321   | 0.526 |
| FETUB   | 0.125         | 0.724       | 0.063   | 0.178      | 0.7232  | 1.065      | 0.752    | 1.509   | 0.516 |
| HPX     | 0.102         | 0.749       | -0.0291 | 0.092      | 0.7511  | 0.971      | 0.812    | 1.162   | 0.512 |
| SOD3    | 0.272         | 0.602       | -0.8764 | 1.889      | 0.6427  | 0.416      | 0.010    | 16.873  | 0.439 |

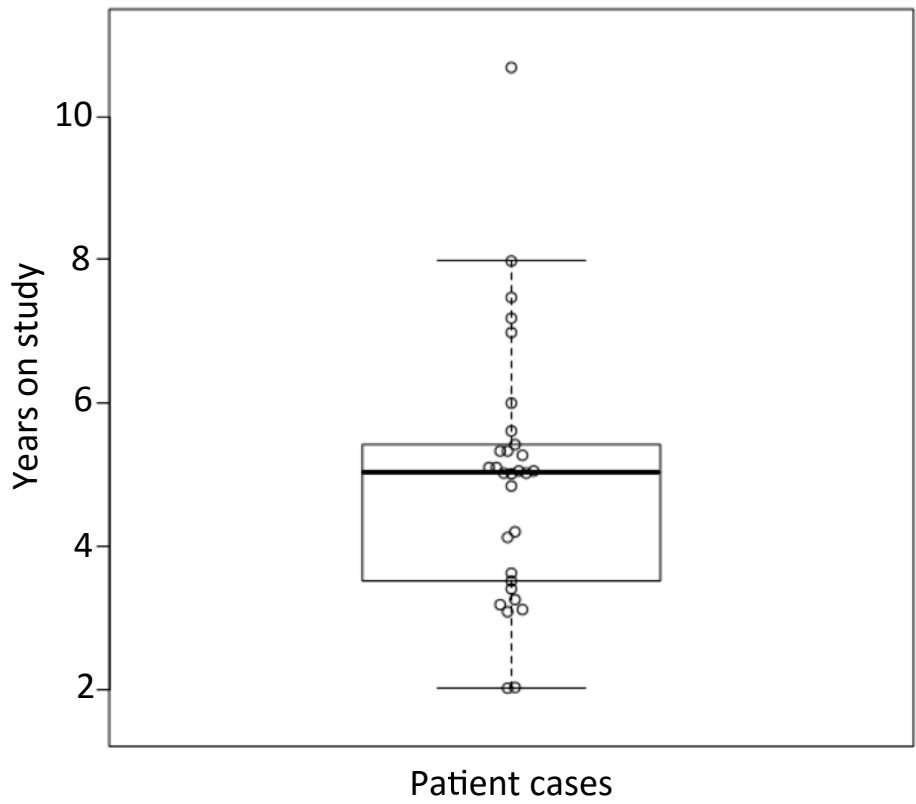

**Supplementary Figure S1.** Number of years each patient was monitored by CTC prior to polypectomy. Each circle represents one patient. The median number of years on study (thick black line) was 5 years.

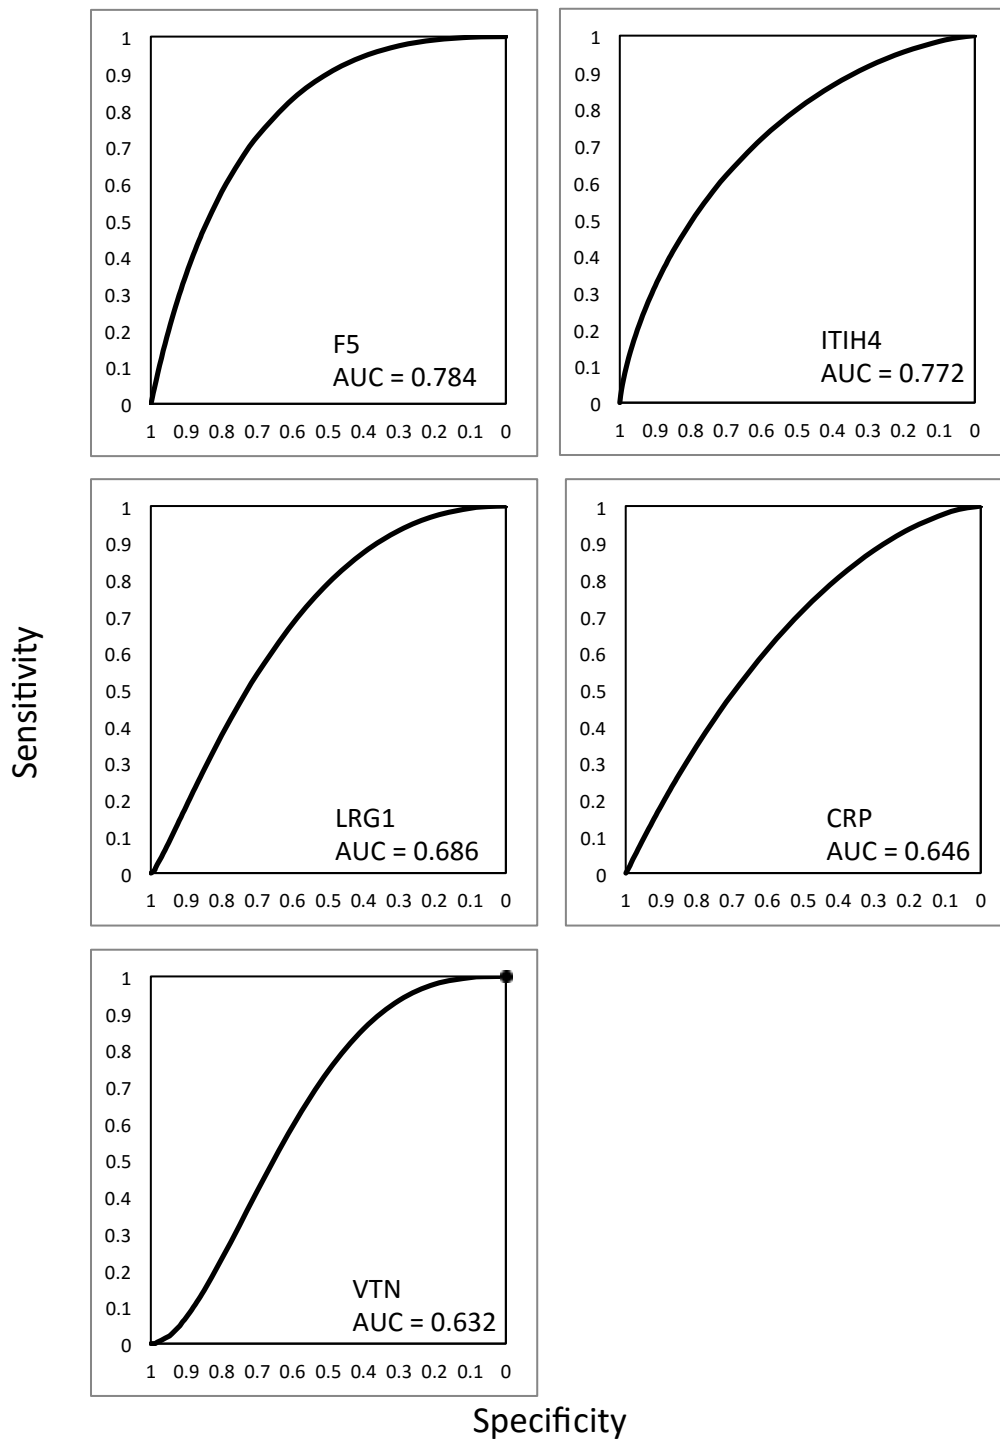

**Supplementary Figure S2.** Individual protein ROC curves for growing versus unknown growth for top performing proteins. ROC curves were computed by Method 5 in the JROC fit calculation (Eng, J. ROC analysis: web-based calculator for ROC curves. 2017 Cited July 2017; Available from: <http://www.jrocfite.org>).

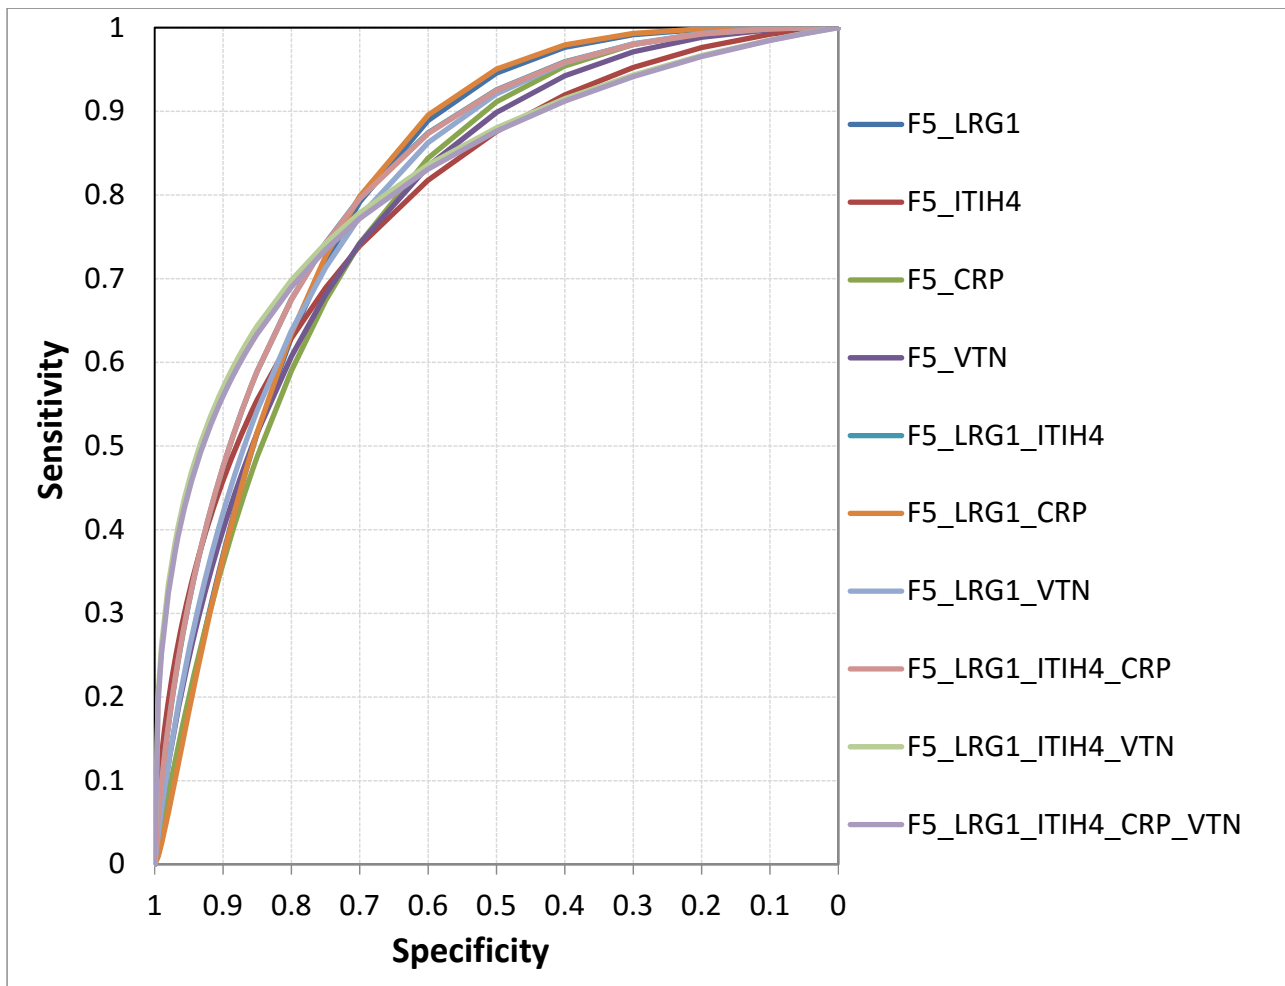

**Supplementary Figure S3.** Overlays of the ROC curves from multiple marker panel analyses. The ROC curves shown in Supplementary Figure 2 dictate that each of these panels lie in the top echelon. The panel F5, ITIH4, LRG1 and VTN ranked in this top echelon. It was subjected to the validation test on the set of early adenomas in the Pirc rat model (Ivancic et al. *Cancer Prev Res* 2014; 7:1160-1169).

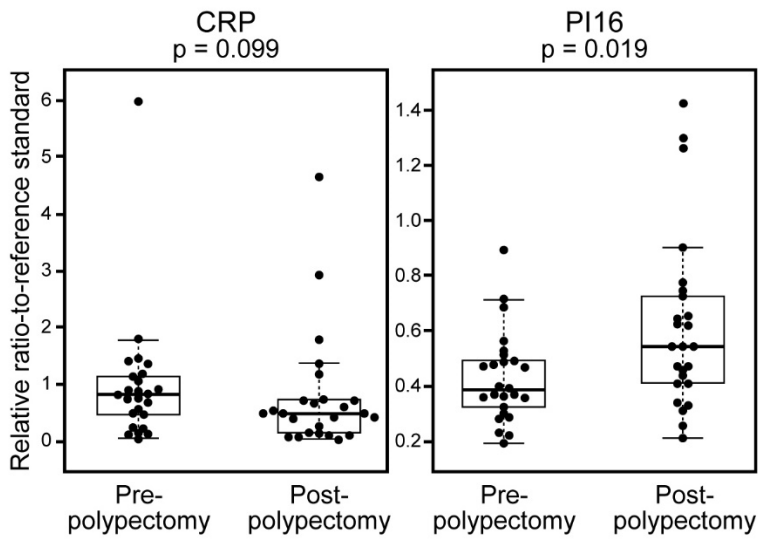

**Supplementary Figure S4.** Group analysis of adenoma association of serum CRP and PI16 levels. Scatterplots show the distribution of the relative levels of the biomarkers CRP and PI16 across the set of adenoma-bearing patients. The median of each non-parametric distribution is given by the black central line of the box-and-whisker plot.

**Supplementary Figure S5.** Seventeen serum biomarkers for which the paired sample analysis fails to show specificity for ambient marker level or for adenoma class. For the seventeen serum biomarkers other than CRP and PI16 (which are shown in Figure 5), the calculated ratios of biomarkers level are plotted against their corresponding input, expressed as the post-polypectomy level. Black-filled symbols represent high risk cases; white-filled symbols represent low-risk cases.

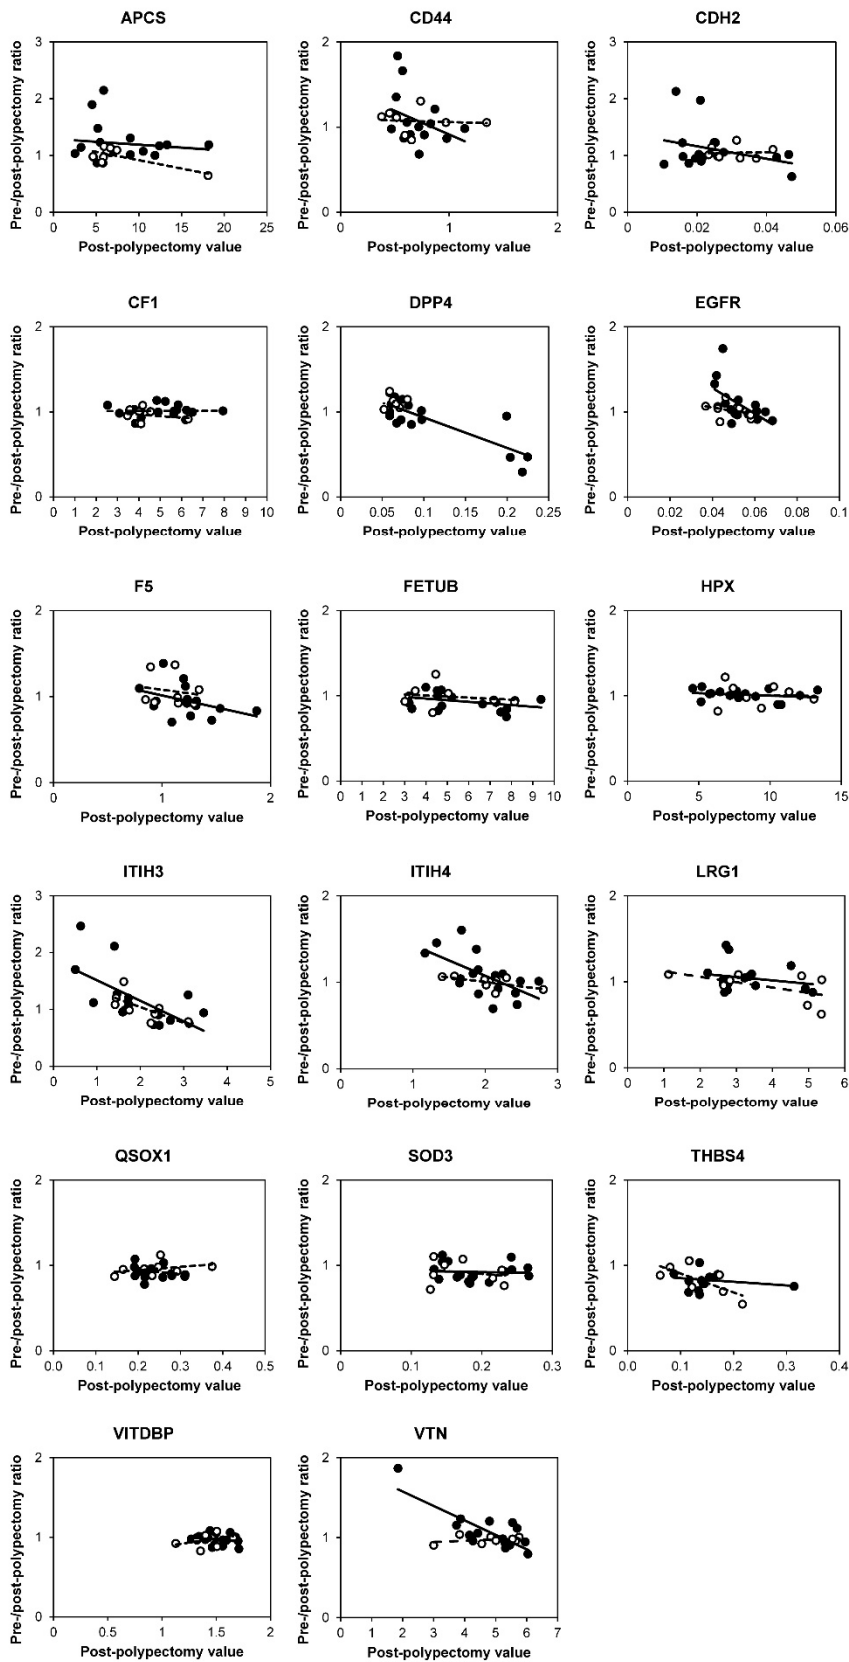

Supplement: pnas.1813212116.sapp.pdf [file pnas.1813212116.sapp.pdf]
